# Supplementary material for: A novel magnetically guided, oxygen propelled CoPt/Au nanosheet motor in conjugation with a multilayer hollow microcapsule for effective drug delivery and light triggered drug release
Source: Royal Society of Chemistry journal article supplement (doi:10.1039/d3tb01888a), 2023-11-27
Supplement: d3tb01888a5.pdf [file d3tb01888a5.pdf]

## Supporting Information

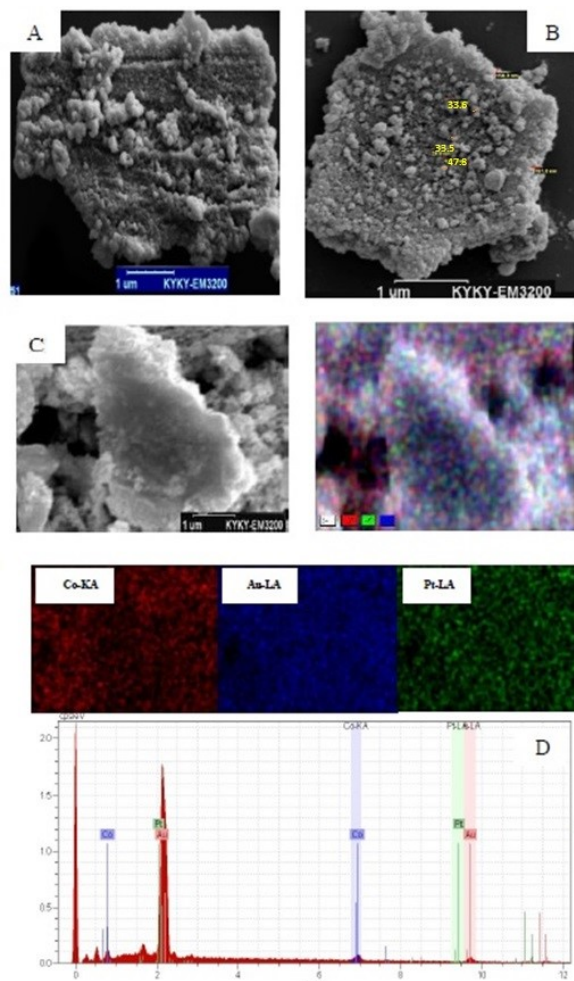

**Figure S1:** (A,B) FE-SEM, (C) SEM/EDX images and (D) EDX spectra obtained for NSMs.

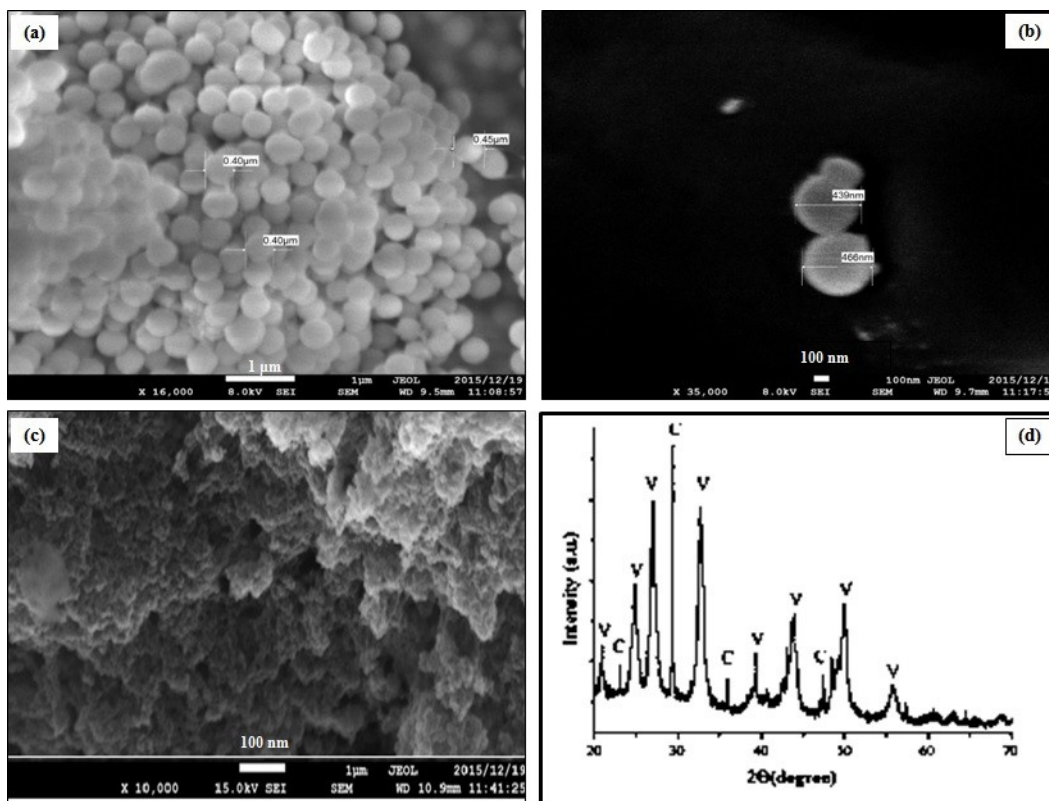

**Figure S2:** (a, b and c) SEM images of  $\text{CaCO}_3$  (CMC) microparticles with different magnifications and (d) XRD pattern of  $\text{CaCO}_3$  (CMC) microparticles (V and C denote vaterite and calcite, respectively).

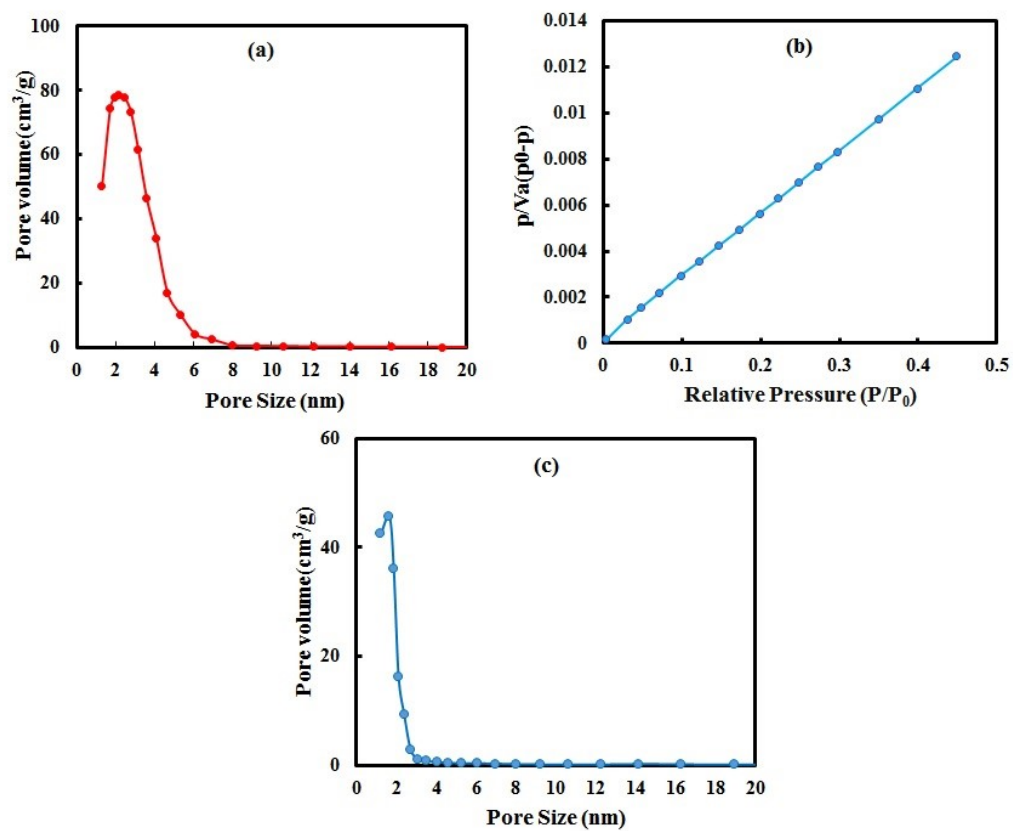

**Figure S3:** (a) Pore size distribution and (b) plot of the adsorption versus partial pressure of  $\text{CaCO}_3$  (CMC) microparticles and (c) pore size distribution of hollow multilayer magnetic microcapsule.

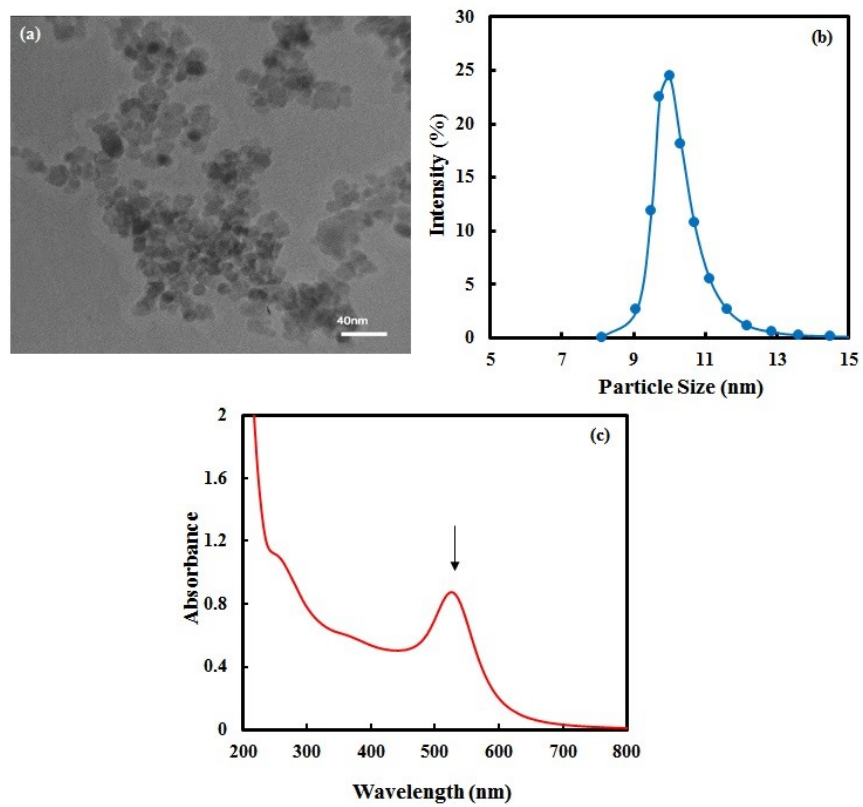

**Figure S4:** (a) TEM image, (b) size distribution and (c) UV-Vis absorption spectrum of Au NPs.

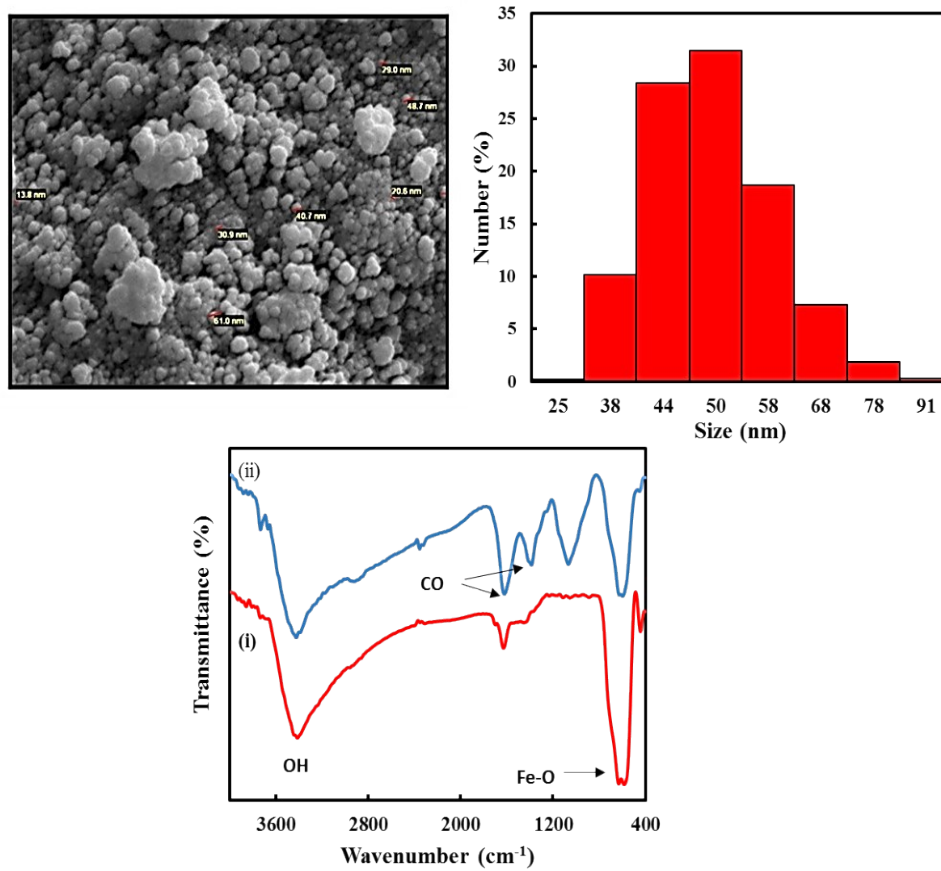

**Figure S5: (a)** SEM image, **(b)** size distribution and **(c)** FTIR spectra of the (i) Fe<sub>3</sub>O<sub>4</sub> and (ii) citrate coated Fe<sub>3</sub>O<sub>4</sub> NPs.

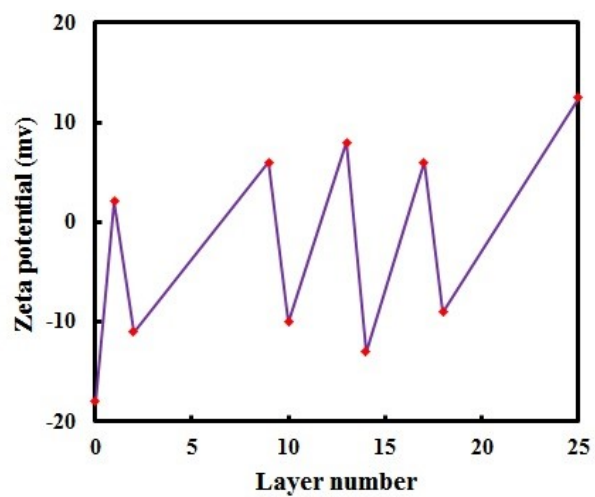

**Figure S6:** Zeta potential measurement as a function of layer numbers of coated calcium carbonate microparticles (number 0 represents bare microparticles).

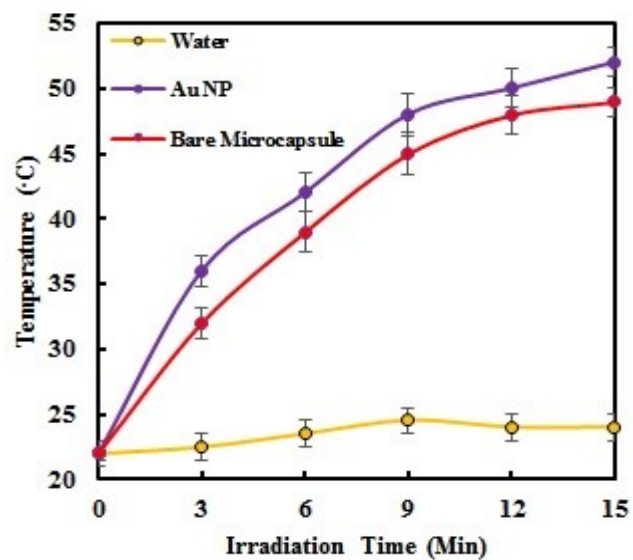

**Figure S7:** The photothermal effects of water, Au NPs and an aqueous dispersion of magnetic multilayer microcapsule (1mg) under NIR irradiation at a power density of  $200\text{mW cm}^{-2}$ .

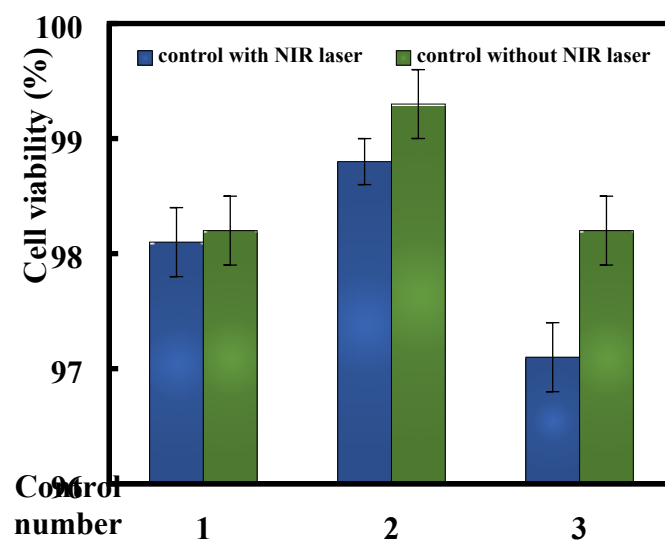

**Figure S8:** *In vitro* cell viability in the control culture medium without/with 200 mw NIR irradiation for 15 min.

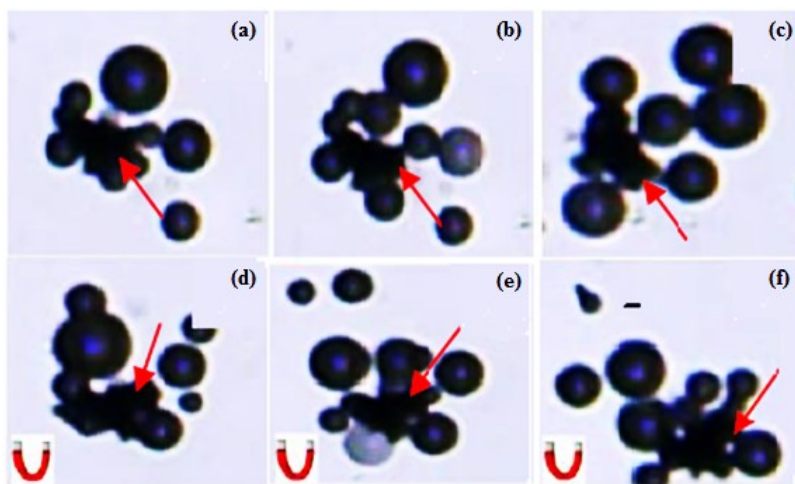

**Figure S9:** Remote magnetic guidance of oxygen-propelled NSM in PBS solution with 1%  $\text{H}_2\text{O}_2$  at  $37^\circ\text{C}$ . The arrows show the movement of NSM in the absence (a, b, c) and the presence (d, e, f) of magnetic field (0.5 Tesla). The magnification of images is 640 times.

**SI Video 1.** Autonomous motion of NSMs in 1%  $\text{H}_2\text{O}_2$  solution in PBS (pH 7.4) at  $37^\circ\text{C}$ .

**SI Video 2.** Pick-up of DOX loaded magnetic multilayer microcapsule using NSM in 1%  $\text{H}_2\text{O}_2$  in PBS (pH 7.4) under a magnetic field of about 0.5 Tesla.

**SI Video 3.** Transport of DOX loaded magnetic multilayer microcapsule using NSM in 1%  $\text{H}_2\text{O}_2$  in PBS (pH 7.4) under a magnetic field of about 0.5 Tesla.

**SI Video 4.** Attachment of NSMs to HeLa cells.
